# Supplementary material for: Detailed GPC analysis of poly(N-isopropylacrylamide) with core cross-linked star architecture
Source: Royal Society of Chemistry journal article supplement (doi:10.1039/d1py00966d), 2021-01-01
Supplement: d1py00966d1.pdf [file d1py00966d1.pdf]

## ELECTRONIC SUPPORTING INFORMATION

### Detailed GPC Analysis of Poly(*N*-isopropylacrylamide) with Core Cross-linked Star Architecture

Alessandra Monaco<sup>a,b,†</sup>, Ben Drain<sup>a,b,†</sup>, C.Remzi Becer<sup>\*</sup>

<sup>a</sup> Department of Chemistry, University of Warwick, CV4 7AL, Coventry, UK

<sup>b</sup> Polymer Chemistry Laboratory, School of Engineering and Materials Science, Queen Mary University of London, London, E1 4NS, UK

Corresponding author: [Remzi.becer@warwick.ac.uk](mailto:Remzi.becer@warwick.ac.uk)

#### 1. Arm Conversion Calculation

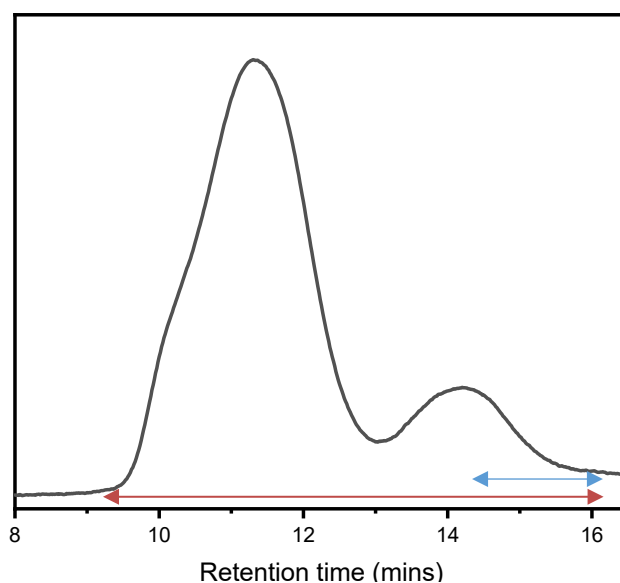

**Figure S1:** Example arm conversion calculation utilising the GPC RI trace. The example shown is for **P3** (85% conversion).

$$\% \text{ Conversion} = 100 - \left( \frac{2(\text{blue area})}{\text{red area}} \times 100 \right)$$

The above equation was used to estimate the arm conversion for the star polymers using the refractive index detector response.

Assumptions:

- 1) The left over arm peak is Gaussian in nature
- 2)  $\frac{dn}{dc}$  is the same or similar for both the arm and star polymer

## 2. DLS Measurements of the Star Polymers

A

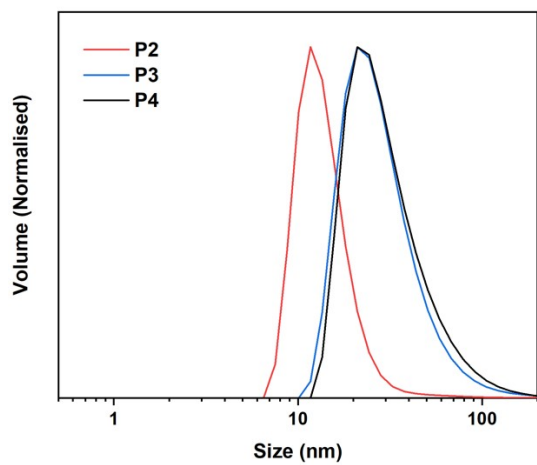

B

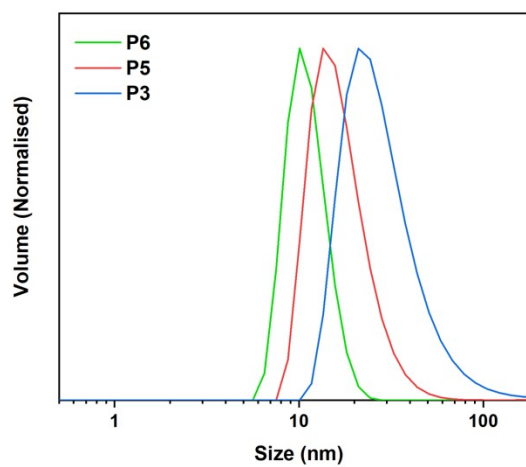

C

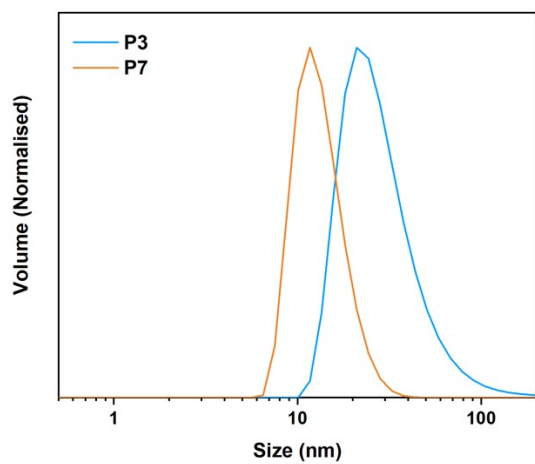

**Figure S2:** DLS measurements of the star crosslinked polymers in DMF: (A) stars with different core size, (B) stars with different arm length and (C) stars with different crosslinker.

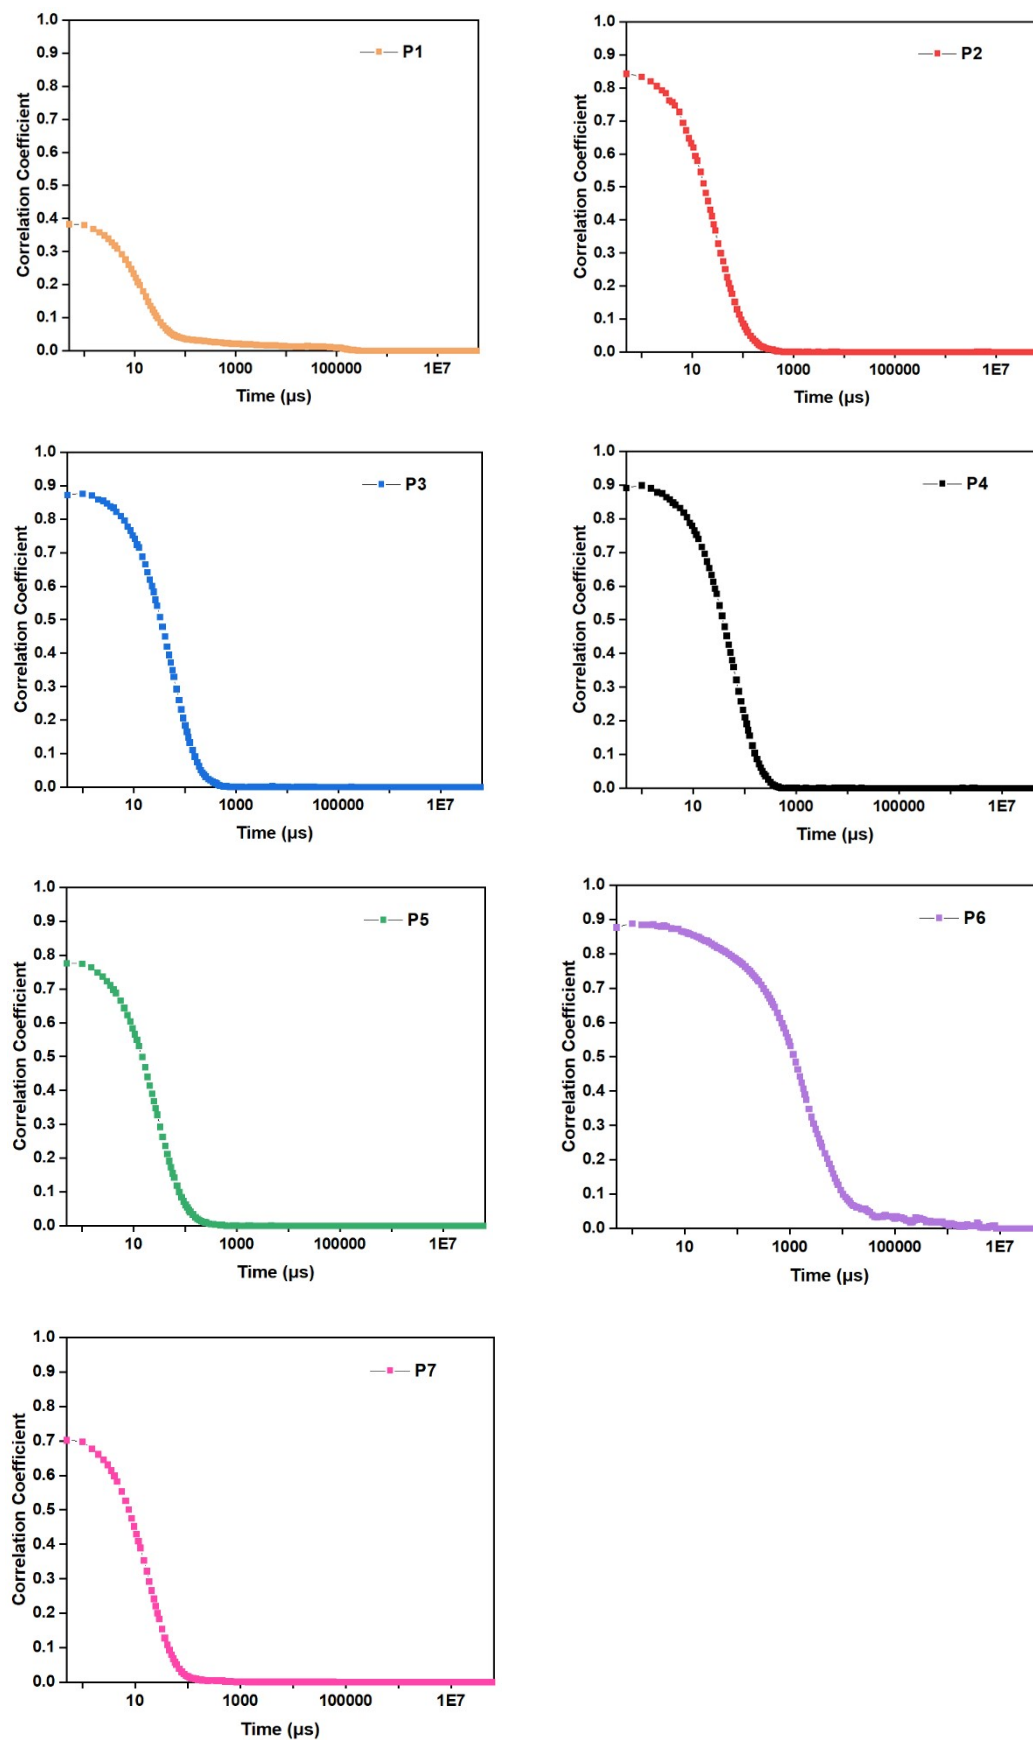

Figure S3: Plots of the correlation function of the star polymers.

### 3. Combined Mark-Houwink Plots for All Polymers Studied

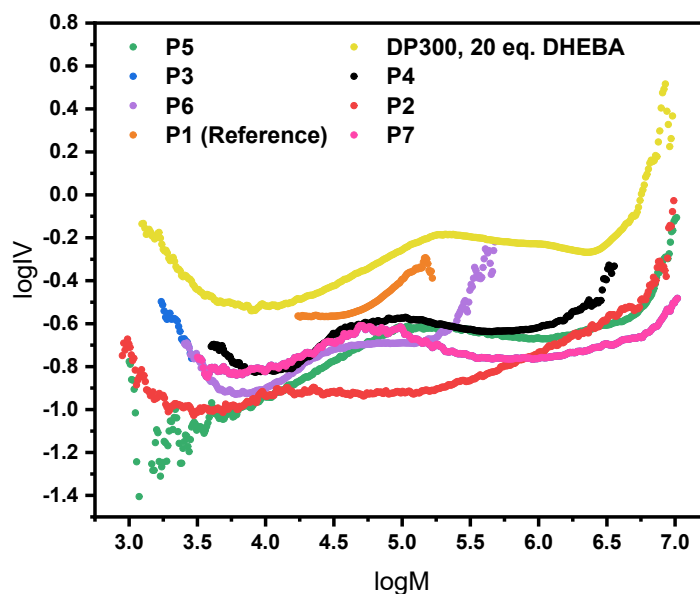

**Figure S4:** Combined Mark-Houwink plots for **P1-P7**. Included is the reference used for the functionality calculations (**P1**). Note that a DP300, 20eq. of DHEBA is also included but was excluded from the main results due to the partial solubility. This affected the results by giving it a higher IV than reality.

#### 4. Combined $g'$ plots for P2-P7

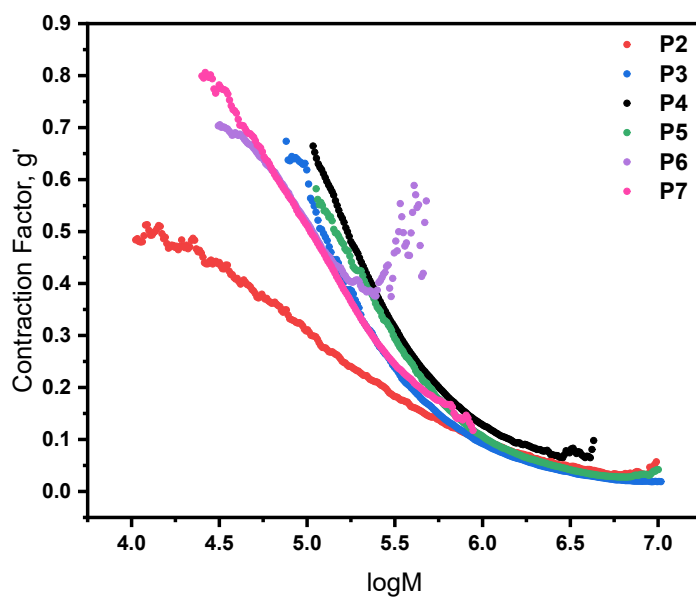

**Figure S5:**  $g'$  plots for **P2-P7** as calculated using equation 3. Higher  $g'$  values corresponds to fewer arms

## 5. Overlaid Distribution and Mark-Houwink Plots

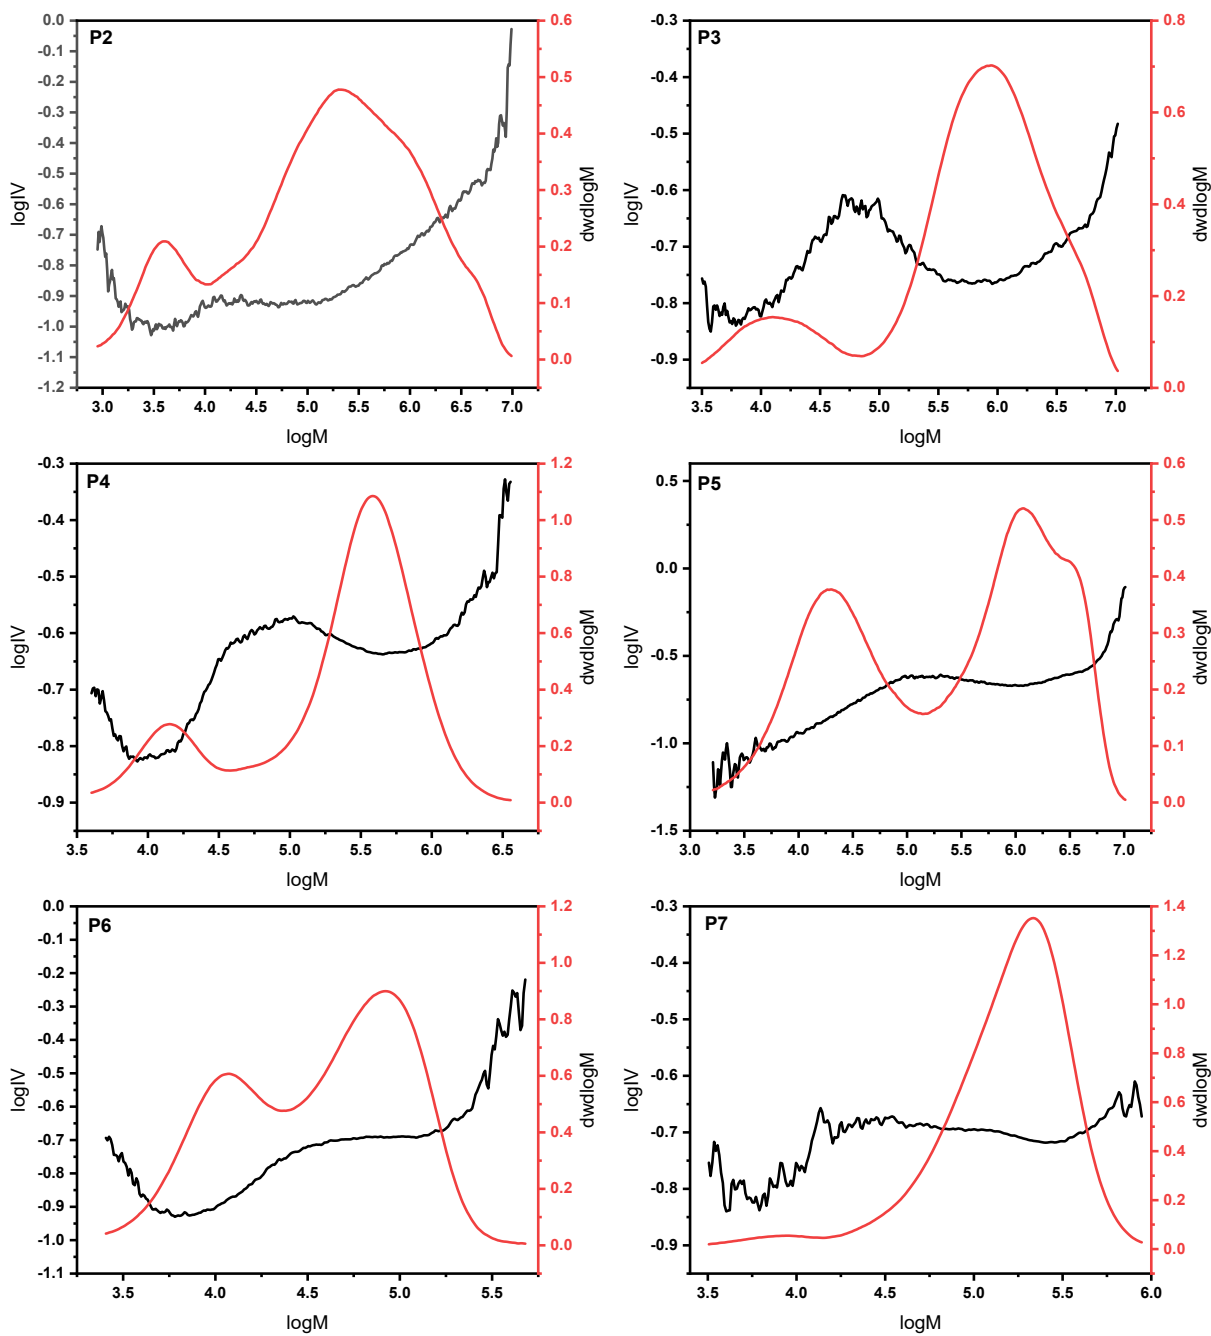

**Figure S6:** Distribution plots overlaid with the Mark-Houwink plots for **P2-P7**. These plots confirm the linear region is left over arms/dimers and show where the IV lies in the distribution.
